# Supplementary material
Source: publisher figshare collection journal article supplement (https://gsapubs.figshare.com/articles/dataset/_/13244231)
Supplement: Supplementary file 1 [file 1]

Jian-Hui Liu, Xiang-Jian Wang, and Hui Chen, 2020, Intracontinental extension and geodynamic evolution of the Paleoproterozoic Jiao-Liao-Ji belt, North China craton: Insights from coeval A-type granitic and mafic magmatism in eastern Liaoning Province: GSA Bulletin, <https://doi.org/10.1130/B35819.1>.

## Supplemental Material

**Table S1.** Whole-rock geochemical data for the Paleoproterozoic monzo(syeno)granitic gneisses and metamafic rocks in the Kuandian area, eastern Liaoning Province, Jiao-Liao-Ji Belt.

**Table S2.** LA-ICP-MS U-Pb dating data for zircons from the Paleoproterozoic monzo(syeno)granitic gneiss and metamafic rock samples collected from the Kuandian area, eastern Liaoning Province, Jiao-Liao-Ji Belt.

**Table S3.** Lu-Hf isotope analytical data for zircons from the Paleoproterozoic monzo(syeno)granitic gneiss and metamafic rock samples collected from the Kuandian area, eastern Liaoning Province, Jiao-Liao-Ji Belt.
